# Supplementary material for: Daptomycin Population Pharmacokinetics in Patients Affected by Severe Gram-Positive Infections: An Update
Source: MDPI journal article supplement (doi:10.3390/antibiotics11070914), 2022-07-07
Supplement: s1 [file s1]

# Daptomycin population pharmacokinetics in patients affected by severe Gram-positive infections: an update

Balice G.; Passino C.; Bongiorno M.G.; Segreti L.; Russo A.; Lastella M.; Luci G.; Falcone M.; Di Paolo A.

## Supplementary material

**Table S1.** Dose-stratified cumulative fraction of response for MRSA (AUC/MIC 666). Data for the 12 mg/kg daily doses were uninformative and thus omitted.

| Daily dose<br>(mg/kg) | MIC range (mg/L) |       |       |       |      |      |      |    | CFR   |
|-----------------------|------------------|-------|-------|-------|------|------|------|----|-------|
|                       | 0.25             | 0.5   | 1     | 2     | 4    | 8    | 16   | 32 |       |
| 4                     | 100              | 97.55 | 22.69 | 1.11  | 0.11 | 0.04 | 0    | 0  | 88.83 |
| 6                     | 100              | 100   | 66.72 | 4.42  | 0.21 | 0.03 | 0.03 | 0  | 95.77 |
| 8                     | 100              | 100   | 95.63 | 19.02 | 0.96 | 0.19 | 0    | 0  | 99.44 |
| 10                    | 100              | 100   | 99.27 | 27.62 | 0.94 | 0.10 | 0.05 | 0  | 99.91 |

Abbreviations: CFR, cumulative fraction of response; MIC; minimum inhibitory concentration.

**Table S2.** Dose-stratified cumulative fraction of response for *S. pneumoniae* (AUC/MIC 438). Data for the 12 mg/kg daily doses were uninformative and thus omitted.

| Daily dose<br>(mg/kg) | MIC range (mg/L) |       |       |       |       |      |      |    | CFR   |
|-----------------------|------------------|-------|-------|-------|-------|------|------|----|-------|
|                       | 0.25             | 0.5   | 1     | 2     | 4     | 8    | 16   | 32 |       |
| 4                     | 100              | 99.96 | 77.46 | 6.79  | 0.37  | 0.07 | 0.04 | 0  | 99.92 |
| 6                     | 100              | 100   | 98.90 | 27.89 | 1.15  | 0.11 | 0.03 | 0  | 99.99 |
| 8                     | 100              | 100   | 100   | 86.35 | 8.23  | 0.16 | 0.10 | 0  | 100   |
| 10                    | 100              | 100   | 100   | 99.04 | 31.36 | 1.48 | 0.19 | 0  | 99.99 |

Abbreviations: CFR, cumulative fraction of response; MIC; minimum inhibitory concentration.

**Table S3.** Dose-stratified cumulative fraction of response for *E. faecium* (AUC/MIC 294,95). Data for the 12 mg/kg daily doses were uninformative and thus omitted.

| Daily dose<br>(mg/kg) | MIC range (mg/L) |       |       |       |      |      |      | CFR   |
|-----------------------|------------------|-------|-------|-------|------|------|------|-------|
|                       | 0.5              | 1     | 2     | 4     | 8    | 16   | 32   |       |
| 4                     | 100              | 99.41 | 36.37 | 1.78  | 0.19 | 0.04 | 0.04 | 33.81 |
| 6                     | 100              | 100   | 83.46 | 7.85  | 0.34 | 0.03 | 0.03 | 68.01 |
| 8                     | 100              | 100   | 99.04 | 31.36 | 1.48 | 0.19 | 0    | 83.74 |
| 10                    | 100              | 100   | 99.95 | 42.31 | 1.93 | 0.16 | 0.10 | 86.64 |

Abbreviations: CFR, cumulative fraction of response; MIC; minimum inhibitory concentration.
